# Supplementary material for: Social protection and climate resilience among informal workers in Pakistan: a qualitative study from Khyber Pakhtunkhwa
Source: Research Square preprint supplement (doi:10.21203/rs.3.rs-8263407/v1), 2025-12-10
Supplement: Supplementary file 1 [file 14a672270e09a30168fa07e0.docx]

**Focus Group Discussion (FGD) Topic Guide**

**Introduction**

- Welcome participants and introduce yourself.
- Explain the purpose of the discussion: to explore the role of socio-economic incentives (BISP and one-time cash grants) in enhancing climate resilience for informal sector workers.
- Assure confidentiality and encourage open discussion.
- Obtain verbal consent.

## **1. Climate Change and Its Impact on Livelihoods**

- What kinds of changes in weather or climate have been observed in recent years?
- In what ways have these changes (e.g., floods, heatwaves, droughts, unseasonal rainfall) affected work, income, or daily routines within the community?
- What challenges have emerged due to these climate-related changes?
- How have communities been coping with these challenges?
- What traditional practices or local support systems have played a role in managing these impacts?

**2. Awareness and Perceptions of Socio-Economic Support Programs**

- What is known about financial assistance programs such as cash transfers or emergency relief initiatives?
- How are these programs perceived in terms of their effectiveness in helping people recover from climate-related disruptions?
- What examples exist of financial assistance making a difference in households or communities?

**3. Access to Socio-Economic Incentives: Barriers and Enablers**

- How accessible are these financial support programs to different groups?
- What barriers have been experienced in accessing assistance (e.g., limited awareness, application difficulties, delays, eligibility issues)?
- What conditions or factors have helped facilitate access to support?
- How have these barriers influenced the ability to recover from climate impacts?

**4. Role of Financial Assistance in Building Climate Resilience**

- In what ways has financial support been utilized (e.g., food, healthcare, rebuilding livelihoods)?
- Has this support contributed to improved income stability, food security, or business continuity?
- How does financial support enhance long-term resilience to climate-related challenges?

**5. Recommendations for Improvement**

- What changes could be made to improve the effectiveness of financial support programs?
- What additional forms of support (e.g., vocational training, access to credit, insurance coverage) would strengthen climate preparedness?
- What is one key recommendation for improving socio-economic support systems in the context of climate impacts?

**Closing**

- Ask if participants have any final thoughts or suggestions.
- Thank participants for their time and valuable insights.
