# Supplementary material for: Social protection and climate resilience among informal workers in Pakistan: a qualitative study from Khyber Pakhtunkhwa
Source: Research Square preprint supplement (doi:10.21203/rs.3.rs-8263407/v1), 2025-12-10
Supplement: Supplementary file 2 [file 18a9188c81fab89eada3c55a.docx]

**Introduction**

- Introduce yourself and explain the purpose of the study.
- Assure confidentiality, obtain verbal and written consent.
- After consent, ask basic background questions (age, gender, occupation, years in informal sector, household size) to be written.

**1. Climate Change and Its Impact on Work and Livelihoods**

- Have you noticed any changes in the weather over the years?
- How have these changes (e.g., extreme heat, floods, droughts) affected your work, income, or daily life?
- What challenges have you faced due to these climate changes?
- What strategies do you use to cope with these challenges?

**2. Perceptions of One-Time Cash Grants and BISP**

- Are you aware of financial support programs like the **Benazir Income Support Program (BISP)** or **one-time cash grants**?
- Have you or anyone in your family received this support?
- In your experience, how effective has this support been in helping you recover from climate-related financial losses?
- Did the support help you prepare for or recover from events like floods, heatwaves, or droughts? If yes, how?

**3. Barriers and Facilitators in Accessing Financial Support**

- How easy or difficult was it to apply for and receive financial support?
- What challenges did you face in accessing these programs (e.g., lack of information, complicated procedures, delays, corruption)?
- What made it easier for you to receive the support?
- How do these barriers impact your ability to recover from climate-related disruptions?

**4. Impact of Financial Assistance on Households and Businesses**

- How was the financial support used in your household or business?
- Did it help improve your income stability, food security, or healthcare access?
- Did it make your work or business more resilient to climate challenges? If yes, in what ways?

**5. Recommendations for Improvement**

- What improvements do you suggest to make financial support programs more effective for workers like you?
- What other types of support (e.g., training, insurance, better access to loans) would help improve climate resilience?
- If you could suggest one major change to these programs, what would it be?

**Closing**

- Any final thoughts or suggestions?
- Thank the participant for their time.
